# Supplementary material
Source: Springer Nature journal article supplement (https://www.springermedizin.de/resource/supplementary/12958_2009_594_MOESM6_ESM.pdf/9568054)

1 2 3 4 5 6

55-  
45-  
34-  
17-

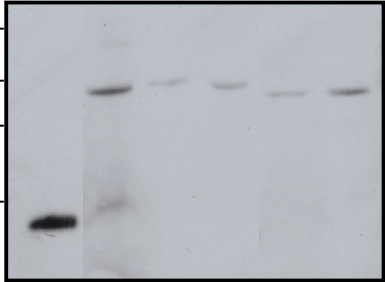

← Nodal Precursor

← Nodal

Supplement: MOESM6 [file 9568054]
